# Supplementary material
Source: PubMed Central journal article supplement (PMC9763546)
Supplement: NIHMS1812885-supplement-1.pdf [file NIHMS1812885-supplement-1.pdf]

**Screening**

3,266 Evaluated for study inclusion

1,354 Not considered further

- 793 Not born 24 0/7 – 27 6/7 weeks GA
- 261 Parents uninterested or unable to consent
- 89 Research team unavailable
- 85 Unlikely to be followed
- 55 Participating in a competing study
- 27 Died before screening
- 44 Other reasons

**1,912** Screened further for study eligibility

**Allocation**

971 Were not randomized

- 215 Did not meet inclusion criteria
- 755 Eligible, but did not consent
- 1 Eligible, consented but died prior to randomization

**941** Underwent randomization

- 481 Gestational age 24-25w
- 460 Gestational age 26-27w

**Analysis**

**832** Survived to discharge

- 11 Excluded – missing BPD evaluation

**821** Included
